# Supplementary material for: Electrochemical Investigation of the OER Activity for Nickel Phosphite-Based Compositions and Its Morphology-Dependent Fluorescence Properties
Source: MDPI journal article supplement (doi:10.3390/cryst12121803), 2022-12-12
Supplement: s1 [file s1]

## Supplementary Data

### Electrochemical investigation of the OER activity for nickel phosphite-based compositions and its morphology-dependent fluorescence properties

Maria Poienar<sup>1</sup>, Paula Svera (m. Ianasi)<sup>1</sup>, Bogdan - Ovidiu Taranu<sup>1</sup>, Catalin Ianasi<sup>2</sup>, Paula Sfirloaga<sup>1</sup>, Gabriel Buse<sup>3</sup>, Philippe Veber<sup>4\*</sup>, Paulina Vlazan<sup>1</sup>

<sup>1</sup> National Institute for Research and Development in Electrochemistry and Condensed Matter, Dr. A. Paunescu Podeanu Street, No. 144, 300569, Timisoara, Romania

<sup>2</sup> Coriolan Drăgulescu Institute of Chemistry, Bv. Mihai Viteazul, No. 24, RO-300223, Timișoara, Romania

<sup>3</sup> Institute for Advanced Environmental Research, West University of Timisoara (ICAM-WUT), Oituz Str., No. 4, 300086 Timisoara, Romania

<sup>4</sup> CNRS, Institut Lumière Matière, Université de Lyon, Université Claude Bernard Lyon 1, UMR 5306, Villeurbanne, France

\* Correspondence: philippe.veber2@univ-lyon1.fr

### Equations

Equation (1) was used to convert the measured electrochemical potentials to the Reversible Hydrogen Electrode (RHE) scale [29], Equation (2) was employed to calculate the OER overpotential ( $\eta$ ) [S1], and Equation (3) - the Randles-Sevcik equation - to estimate the electroactive surface area (EASA) and the diffusion coefficient of the electroactive species [30,66].

$$E_{\text{RHE}} = E_{\text{Ag/AgCl(sat. KCl)}} + 0.059 \times \text{pH} + 0.197 \quad (1)$$

$$\eta = E_{\text{RHE}} - 1.23 \quad (2)$$

where:  $E_{\text{RHE}}$  is the reversible hydrogen electrode potential (V),  $E_{\text{Ag/AgCl(sat. KCl)}}$  is the potential vs. the Ag/AgCl (sat. KCl) reference electrode (V), and  $\eta$  is the OER overpotential (V).

$$I_p = (2.69 \times 10^5) \times n^{3/2} \times A \times D^{1/2} \times C \times \nu^{1/2} \quad (3)$$

where:  $I_p$  = the peak current (A);  $n$  = the number of electrons involved in the redox process at  $T = 298 \text{ K}$  ( $n = 1$  for the ferrocyanide/ferricyanide redox system);  $A$  = the surface area of the working electrode ( $\text{cm}^2$ );  $C$  = the bulk concentration of the electroactive species ( $\text{mol L}^{-1}$ );  $\nu$  = the scan rate ( $\text{V s}^{-1}$ ) and  $D$  = the diffusion coefficient of the electroactive species ( $\text{cm}^2 \text{s}^{-1}$ ). The reported theoretical value of the diffusion coefficient in the case of the ferrocyanide/ferricyanide redox system is  $6.7 \times 10^{-6} \text{ cm}^2 \text{s}^{-1}$  [30,67,68].

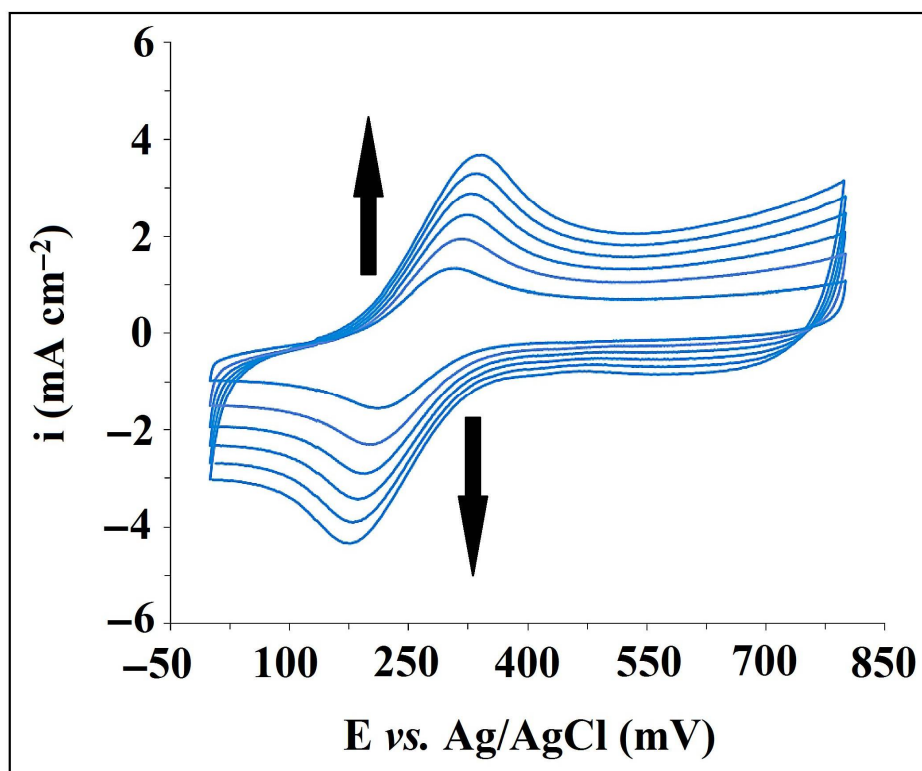

**Figure S1.** Cyclic voltammograms recorded on the G9 electrode in 1 mol L<sup>-1</sup> KNO<sub>3</sub> + 4 mmol L<sup>-1</sup> K<sub>3</sub>[Fe(CN)<sub>6</sub>] electrolyte solution, at various scan rate values ( $\nu = 0.05, 0.1, 0.15, 0.2, 0.25$  and  $0.3 \text{ V s}^{-1}$ ).

**Table S1.** The electrocatalytic properties for the OER of the composition containing Ni<sub>11</sub>(HPO<sub>3</sub>)<sub>8</sub>(OH)<sub>6</sub>, carbon black and rGO, applied on graphite substrate, and that of other electrocatalysts reported in the scientific literature, in 1 mol L<sup>-1</sup> KOH electrolyte solution.

| Electrocatalysts                                                                         | Overpotential (mV) | Current Density (mA cm <sup>-2</sup> ) | Tafel Slope (mV dec <sup>-1</sup> ) | Ref.      |
|------------------------------------------------------------------------------------------|--------------------|----------------------------------------|-------------------------------------|-----------|
| Ni <sub>11</sub> (HPO <sub>3</sub> ) <sub>8</sub> (OH) <sub>6</sub> + carbon black + rGO | 470                | 10                                     | 111                                 | This work |
| MnO <sub>2</sub> + carbon black + Nafion solution                                        | 530                | 10                                     | 144                                 | [47]      |
| Fe <sub>3</sub> O <sub>4</sub> + carbon black                                            | 510                | 10                                     | 310                                 | [47]      |
| 5-(3-hydroxy-phenyl)-10,15,20-tris-(3-methoxy-phenyl)-porphyrin                          | 730                | 10                                     | -                                   | [14]      |
| Pt(II) 5-(3-hydroxy-phenyl)-10,15,20-tris-(3-methoxy-phenyl)-porphyrin                   | 640                | 10                                     | -                                   | [14]      |
| 5-(4-pyridyl)-10,15,20-tris(4-phenoxyphenyl)porphyrin                                    | 780                | 10                                     | 343                                 | [15]      |
| Fe <sub>11.7%</sub> -Co <sub>11</sub> (HPO <sub>3</sub> ) <sub>8</sub> (OH) <sub>6</sub> | 206                | 20                                     | 47                                  | [69]      |
| Co <sub>3</sub> (OH) <sub>2</sub> (HPO <sub>4</sub> ) <sub>2</sub> nanosheets            | 290                | 10                                     | 82                                  | [70]      |
| NiCoFe phosphate nanosheets                                                              | 240                | 10                                     | 58                                  | [71]      |
| NiFe-phosphate/phosphide                                                                 | 230                | 10                                     | 57                                  | [72]      |
| Ni <sub>11</sub> (HPO <sub>3</sub> ) <sub>8</sub> (OH) <sub>6</sub> nanorods             | 232                | 10                                     | 91                                  | [23]      |

|                                                                                                           |     |    |      |      |
|-----------------------------------------------------------------------------------------------------------|-----|----|------|------|
| NiFe-OH-PO <sub>4</sub> nanobelts                                                                         | 249 | 20 | ~42  | [73] |
| Co <sub>3</sub> O <sub>4</sub> @CoP                                                                       | 238 | 10 | ~51  | [74] |
| Fe(PO <sub>3</sub> ) <sub>2</sub> /Ni <sub>2</sub> P/Ni foam                                              | 177 | 10 | ~52  | [75] |
| Ni <sub>12</sub> P <sub>5</sub> /Ni <sub>3</sub> (PO <sub>4</sub> ) <sub>2</sub> hollow spheres           | 318 | 10 | ~52  | [76] |
| porous MoO <sub>2</sub> /Ni foam                                                                          | 250 | 10 | 54   | [77] |
| compact MoO <sub>2</sub> /Ni foam                                                                         | 500 | 10 | 88   | [77] |
| FeP-rGO on Au coated glass                                                                                | 260 | 10 | ~50  | [78] |
| Ni(OH) <sub>2</sub> nanosheets on Ni foam                                                                 | 330 | 10 | 150  | [79] |
| Ni <sub>2</sub> P/Ni/Ni foam                                                                              | 200 | 10 | -    | [80] |
| Ni phosphides porous nanoplates                                                                           | 300 | 10 | 64   | [81] |
| NiCo-MOF                                                                                                  | 250 | 10 | 61   | [82] |
| NiCoP nanocrystals/rGO                                                                                    | 270 | 10 | ~66  | [83] |
| NiCoP on Ni foam                                                                                          | 280 | 10 | 87   | [84] |
| Co <sub>3</sub> (PO <sub>4</sub> ) <sub>2</sub> nanoparticles decorated with nitrogen-doped carbon layers | 317 | 10 | 62   | [85] |
| Ni <sub>3</sub> S <sub>2</sub> nanosheet arrays on Ni foam                                                | 250 | 10 | -    | [86] |
| Ni <sub>2</sub> P nanowires on FTO                                                                        | 400 | 10 | 60   | [87] |
| Ni <sub>2</sub> P nanoparticles on FTO                                                                    | 500 | 10 | 70   | [87] |
| Co <sub>3</sub> O <sub>4</sub> /NiCo <sub>2</sub> O <sub>4</sub> double-shelled nanocages                 | 340 | 10 | 88   | [88] |
| CoP/Cu                                                                                                    | 345 | 10 | 47   | [89] |
| Co/CoO <sub>x</sub> /N-doped carbon hybrids                                                               | 260 | 10 | -    | [90] |
| NiCo layered double hydroxide nanoplates                                                                  | 367 | 10 | 40   | [91] |
| Ni <sub>5</sub> P <sub>4</sub> films                                                                      | 290 | 10 | 40   | [92] |
| NiFeCo-NC2*                                                                                               | 390 | 10 | -    | [93] |
| Co-Fe-1,4-benzenedicarboxylate                                                                            | 295 | 10 | 34.8 | [45] |
| NiFe <sub>2.5</sub> on Ni foam*                                                                           | 495 | 10 | -    | [94] |
| FeNi-MOF (metal-organic framework) nanoarrays on Ni foam                                                  | 213 | 10 | 52.4 | [46] |

---

\* 0.1 mol L<sup>-1</sup> KOH electrolyte solution.
